# Supplementary material for: A Natural Triterpene Derivative from Euphorbia kansui Inhibits Cell Proliferation and Induces Apoptosis against Rat Intestinal Epithelioid Cell Line in Vitro
Source: PubMed Central journal article supplement (PMC4581281; doi:10.3390/ijms160818956), 2015-08-12
Supplement: ijms-16-18956-s001.pdf [file ijms-16-18956-s001.pdf]

# Supplementary Information

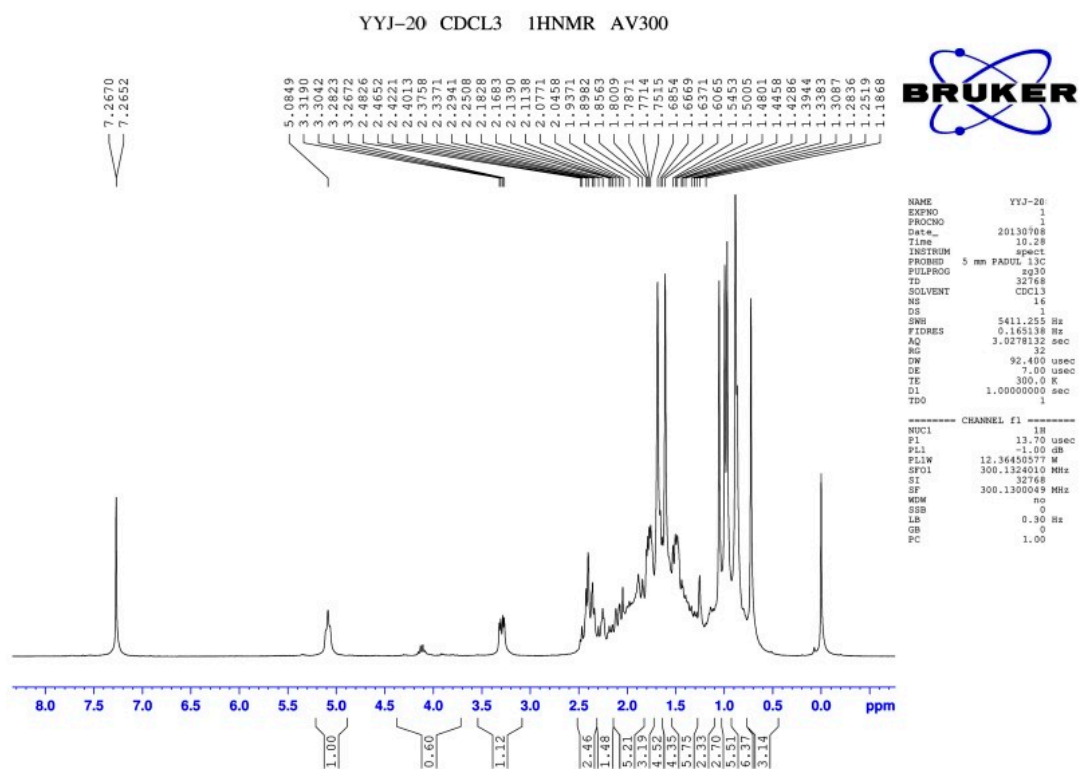

Figure S1. <sup>1</sup>H-NMR spectrum of kansone.

**Table S1.** The <sup>1</sup>H-NMR data for kansenone.

| Position    | Kansenone in Reference [11]        | Our Kansenone                |
|-------------|------------------------------------|------------------------------|
| 1 $\alpha$  | 1.45 m                             | 1.45 m                       |
| 1 $\beta$   | 1.86t ( $J = 13.1, 3.3$ HZ)        | 1.86 m                       |
| 2           | 1.75 m                             | 1.75 m                       |
|             | 1.67 m                             | 1.67 m                       |
| 3 $\alpha$  | 3.29dd ( $J = 4.6, 11.6$ HZ)       | 3.29dd ( $J = 4.6, 11.6$ HZ) |
| 5 $\alpha$  | 1.67 m                             | 1.67 m                       |
| 6 $\alpha$  | 2.40dd ( $J = 3.9, 15.8$ HZ)       | 2.40 m                       |
| 6 $\beta$   | 2.38dd ( $J = 12.4, 15.8$ HZ)      | 2.38 m                       |
| 11 $\alpha$ | 2.37 m                             | 2.37 m                       |
| 11 $\beta$  | 2.24ddd ( $J = 4.2, 4.2, 20.4$ HZ) | 2.25 m                       |
| 12 $\alpha$ | 1.76–1.80 m                        | 1.75–1.80 m                  |
| 15 $\alpha$ | 1.56 m                             | 1.55 m                       |
| 15 $\beta$  | 2.13 m                             | 2.14 m                       |
| 16 $\alpha$ | 1.33 m                             | 1.34 m                       |
| 16 $\beta$  | 1.93 m                             | 1.94 m                       |
| 17          | 1.43 m                             | 1.43 m                       |
| 18          | 0.72 s                             | 0.73 s                       |
| 19          | 1.05 s                             | 1.06 s                       |
| 20          | 1.43 m                             | 1.43 m                       |
| 21          | 0.88d ( $J = 6.0$ HZ)              | 0.88d ( $J = 6.0$ HZ)        |
| 22          | 1.13 m, 1.56 m                     | 1.13 m, 1.55 m               |
| 23          | 1.90 m, 2.04 m                     | 1.90 m, 2.05 m               |
| 24          | 5.08 m                             | 5.08 m                       |
| 26          | 1.68 s                             | 1.69 s                       |
| 27          | 1.61 s                             | 1.61 s                       |
| 28          | 0.99 s                             | 0.99 s                       |
| 29          | 0.88 s                             | 0.88 s                       |
| 30          | 0.97 s                             | 0.97 s                       |

Kansenone was isolated by HPLC. <sup>1</sup>H-NMR spectrum was employed to confirm the acquirement of kansenone, and the data is consistent with the reported reference.
